# Supplementary material
Source: publisher site journal article supplement (https://zookeys.pensoft.net/article/19854/download/suppl/32/)
Supplement: Supplementary file 1

## Sheet: BIOICEspecies
	104 m 2062	1048 m 2077	735 m 2087	617 m 2088	539 m 2090	303 m 2094	300 m 2096	1141 m 2100	905 m 2107	489 m 2114	417 m 2136	297 m 2137	293 m 2149	63 m 2198	81 m 2207	260 m 2213	213 m 2215	240 m 2221	293 m 2236	296 m 2237	446 m 2267	313 m 2273	1390 m 2288	263 m 2308	139 m 2314	772 m 2318	776 m 2319	554 m 2324	555 m 2325	430 m 2327	1302 m 2340	350 m 2352	318 m 2358	719 m 2367	171 m 2388	1074 m 2410	1407 m 2707	300 m 2719	304 m 2720
station	2062	2077	2087	2088	2090	2094	2096	2100	2107	2114	2136	2137	2149	2198	2207	2213	2215	2221	2236	2237	2267	2273	2288	2308	2314	2318	2319	2324	2325	2327	2340	2352	2358	2367	2388	2410	2707	2719	2720
Amphilochoides boecki Sars, 1892	0	0	0	0	0	0	0	0	0	0	0	0	0	0	0	0	0	0	0	0	0	0	0	0	0	0	0	0	0	0	0	0	0	0	0	0	0	0	0
Amphilochoides serratipes (Norman, 1869)	0	0	0	0	0	0	0	0	0	0	0	0	0	0	0	0	0	0	0	0	0	0	0	0	0	0	0	0	0	0	0	0	0	0	0	0	0	0	0
Amphilochopsis hamatus Stephensen, 1925	0	91	25	20	2	0	23	40	113	0	5	0	13	0	0	2	0	0	1	0	0	0	0	0	0	1	2	0	0	0	2	0	0	2	0	6	1	2	0
Amphilochus anoculus sp nov this SI 2017	0	0	17	3	0	1	0	17	17	0	3	0	4	0	0	0	0	0	0	0	0	0	0	0	0	2	0	0	7	0	0	0	0	12	0	0	0	0	0
Amphilochus manudens Spence Bate, 1862	0	0	0	0	0	0	46	0	0	0	0	0	0	0	19	2	6	13	2	199	0	2	0	1	1	0	0	0	0	0	0	1	2	0	0	0	0	0	17
Amphilochus tenuimanus Boeck, 1871	0	0	0	100	1	2	7	0	127	2	0	0	110	0	0	3	0	2	0	23	0	0	0	0	1	1	0	0	0	0	0	4	10	2	0	0	0	1	23
Gitana abyssicola Sars, 1895	0	0	8	4	0	0	0	2	0	1	1	14	0	0	0	0	0	1	0	0	0	0	0	0	0	0	0	0	0	1	0	0	0	0	0	0	0	0	0
Gitana rostrata Boeck, 1871	0	0	0	2	0	0	0	0	0	0	0	0	0	0	0	0	1	0	0	1	0	1	0	0	0	0	0	1	15	3	0	0	0	1	1	0	0	0	0
Gitana sarsi Boeck, 1871	0	0	6	9	17	0	0	12	2	0	0	0	3	0	0	0	3	0	0	2	0	0	0	0	0	0	0	0	0	1	0	0	0	0	0	0	0	0	2
Gitanopsis arctica Sars, 1895	13	0	0	1	7	0	0	1	0	0	0	0	10	3	0	0	0	0	0	3	0	0	0	0	0	0	0	0	1	1	0	1	0	5	0	0	0	0	1
Gitanopsis bispinosa (Boeck, 1871)	0	0	0	56	0	0	13	0	23	1	1	0	53	0	0	4	0	1	0	6	0	0	0	0	0	3	0	0	1	2	0	0	5	0	0	0	0	0	1
Gitanopsis inermis (Sars, 1883)	0	0	0	4	0	0	1	0	0	0	0	0	2	0	0	0	0	0	0	6	1	0	0	1	0	0	0	0	3	0	0	0	0	1	0	0	0	0	5
Paramphilochoides odontonyx (Boeck, 1871)	0	0	0	0	0	0	0	0	0	0	0	0	0	0	0	0	0	0	0	0	0	0	0	0	0	0	0	0	0	0	0	0	0	0	0	0	0	0	0

## Sheet: IceAGEspecies
station	866-7	867-1	868-3	869-3	870-4	871-5	876-5	878-1	879-5	880-2	963	983	1006	1010	1017	1019	1032	1054	1057	1082	1086	1104	1119	1123	1132	1159	1168	1172	1181	1194	1219	1222	SUM
Amphilochoides boecki Sars, 1892	25	8	1	0	0	0	1	0	0	0	0	0	0	0	0	0	0	0	0	0	0	0	0	0	0	0	0	0	0	0	0	0	35
Amphilochoides serratipes (Norman, 1869)	0	27	2	0	0	0	0	0	0	0	0	0	0	0	0	0	0	0	0	0	0	0	0	0	0	0	0	0	0	0	0	0	29
Amphilochopsis hamatus Stephensen, 1925	0	0	0	9	0	0	0	0	0	0	0	0	13	4	0	14	0	0	0	0	0	0	4	2	1	0	0	15	0	0	0	0	62
Amphilochus anoculus sp nov this SI 2017	0	0	2	0	0	1	0	0	0	2	0	0	7	16	0	0	0	5	1	0	5	0	16	19	0	4	2	22	1	0	0	0	103
Amphilochus manudens Spence Bate, 1862	3	181	3	0	15	0	3	7	0	0	0	0	0	0	1	0	1	0	0	33	9	9	0	1	0	0	3	0	0	2	9	0	280
Amphilochus tenuimanus Boeck, 1871	0	2	93	11	0	0	0	11	4	7	0	0	0	1	0	0	0	0	0	8	1	0	41	13	3	0	0	0	0	0	60	3	258
Gitana abyssicola Sars, 1895	0	0	0	0	0	0	10	3	3	9	5	1	0	0	0	0	0	1	0	0	0	0	0	0	0	0	0	0	0	0	0	1	33
Gitana rostrata Boeck, 1871	14	0	0	0	0	0	0	0	0	0	0	0	0	0	0	2	0	0	0	0	0	0	0	0	0	0	0	0	0	0	0	0	16
Gitana sarsi Boeck, 1871	22	2	0	3	0	0	0	0	3	0	0	0	0	0	0	0	0	0	0	1	0	0	3	2	0	0	0	0	0	0	19	0	55
Gitanopsis arctica Sars, 1895	0	4	7	0	0	0	1	0	0	1	0	0	0	1	0	0	0	0	0	0	0	3	0	0	0	0	0	0	0	0	0	2	19
Gitanopsis bispinosa (Boeck, 1871)	0	22	11	1	1	0	6	1	0	0	0	0	0	2	0	0	0	0	0	3	0	5	1	0	0	1	0	0	0	0	4	0	58
Gitanopsis inermis (Sars, 1883)	1	8	30	0	0	0	1	0	0	0	0	0	0	0	0	0	0	0	0	0	0	41	0	0	0	5	0	0	0	0	0	0	86
Paramphilochoides odontonyx (Boeck, 1871)	0	0	0	0	1	0	0	0	0	0	0	0	0	0	0	0	0	0	0	0	0	0	0	0	0	1	0	0	0	0	0	0	2
Total	65	254	149	24	17	1	22	22	10	19	5	1	20	24	1	16	1	6	1	45	15	58	65	37	4	11	5	37	1	2	92	6	1036
